# Supplementary material for: Incorporating Cascade Effects of Genetic Testing in Economic Evaluation: A Scoping Review of Methodological Challenges
Source: MDPI journal article supplement (doi:10.3390/children8050346), 2021-04-27
Supplement: s1 [file s1]

## SUPPLEMENTARY FILE A

*How can methods for economic evaluation be modified to include cascade effects from genetic testing to improve the comprehensiveness and quality of evidence?*

Search executed on Jan. 5, 2021.

### Medline – 182 hits

exp cost-benefit analysis/ or exp health care costs/ or exp technology assessment, biomedical/ or exp models, economic/ or exp quality-adjusted life years/ or (cost-benefit analysis or health care cost\* or biomedical technology assessment or economic model\* or quality-adjusted life year\* or cost analysis or cost-utility analysis or cost-consequence analysis or economic evaluation or health technology assessment or decision analytic model\* or decision tree\* or markov model\* or microsimulation\* or monte carlo simulation\* or qaly or health outcome\* or health effect\* or resource utili\* or resource use\*).ab,ti

AND

(cascade or spillover\* or spill over\* or famil\* or child\* or parent\* or mother\* or maternal or father\* or paternal or sibling or brother\* or sister\* or grandparent\* or grandmother\* or grandfather\* or cousin\* or first-degree relative or second-degree relative).ab,ti adj3 (effect\* or cost\* or consequence\* or burden\* or impact\* or resource utili\*).ab,ti

AND

exp genetic testing/ or exp sequence analysis, DNA/ or exp genetic predisposition to disease/ or exp genetic carrier screening/ or ((gen\* or cascade or carrier\* or famil\* or prevent\* or predict\* or variant or mutation).ab,ti adj2 (test\* or screen\* or diagnos\* or analys\*).ab,ti)

### Embase – 303 hits

exp cost benefit analysis/ or exp health care cost/ or exp biomedical technology assessment/ or exp economic model/ or exp quality adjusted life year/ or (cost-benefit analysis or health care cost\* or biomedical technology assessment or economic model\* or quality-adjusted life year\* or cost analysis or cost-utility analysis or cost-consequence analysis or economic evaluation or health technology assessment or decision analytic model\* or decision tree\* or markov model\* or microsimulation\* or monte carlo simulation\* or qaly or health outcome\* or health effect\* or resource utili\* or resource use\*).ab,ti

AND

(cascade or spillover\* or spill over\* or famil\* or child\* or parent\* or mother\* or maternal or father\* or paternal or sibling or brother\* or sister\* or grandparent\* or grandmother\* or grandfather\* or cousin\* or first-degree relative or second-degree relative).ab,ti adj3 (effect\* or cost\* or consequence\* or burden\* or impact\* or resource utili\*).ab,ti

AND

exp genetic screening/ or exp sequence analysis/ or exp genetic predisposition or ((gen\* or cascade or carrier\* or famil\* or prevent\* or predict\* or variant or mutation).ab,ti adj2 (test\* or screen\* or diagnos\* or analys\*).ab,ti)
